# Supplementary material for: A retrospective qualitative report of symptoms and safety from transcranial focused ultrasound for neuromodulation in humans
Source: PubMed Central journal article supplement (PMC7101402; doi:10.1038/s41598-020-62265-8), 2020-03-27
Supplement: 41598_2020_62265_MOESM2_ESM.pdf [file 41598_2020_62265_MOESM2_ESM.pdf]

Subject ID:

PI:

### Participant Report of Symptoms

Type of Non-Invasive Brain Stimulation: TMS \_\_\_ tFUS \_\_\_ Other (Describe): \_\_\_\_\_

|                                                       |             |                                              |                                                                     |                      |
|-------------------------------------------------------|-------------|----------------------------------------------|---------------------------------------------------------------------|----------------------|
| <b>Visit Date:</b>                                    |             | <b>POST</b>                                  | <b>Time:</b>                                                        | <b>Investigator:</b> |
| <b>How are you feeling overall right now?</b>         | Participant |                                              |                                                                     |                      |
| <b>“Right now, do you feel you have or are.....?”</b> |             | <b>Value</b>                                 | <b>Relation</b>                                                     |                      |
|                                                       |             | 1 absent<br>2 mild<br>3 moderate<br>4 severe | 1 unrelated<br>2 unlikely<br>3 possible<br>4 probable<br>5 definite |                      |
| Headache                                              |             |                                              |                                                                     |                      |
| Unusual feelings on the skin of your head             |             |                                              |                                                                     |                      |
| Neck pain                                             |             |                                              |                                                                     |                      |
| Tingling                                              |             |                                              |                                                                     |                      |
| Itchiness                                             |             |                                              |                                                                     |                      |
| Sleepiness                                            |             |                                              |                                                                     |                      |
| Difficulty paying attention                           |             |                                              |                                                                     |                      |
| Unusual /feelings, attitude, emotions                 |             |                                              |                                                                     |                      |
| Tooth pain                                            |             |                                              |                                                                     |                      |
| Change in hearing                                     |             |                                              |                                                                     |                      |
| Nausea/Sick to Stomach                                |             |                                              |                                                                     |                      |
| Unusual twitches or movements in muscles              |             |                                              |                                                                     |                      |
| Dizziness                                             |             |                                              |                                                                     |                      |
| Anxious/Worried/Nervous                               |             |                                              |                                                                     |                      |
| Forgetful                                             |             |                                              |                                                                     |                      |
| Difficulty with your balance                          |             |                                              |                                                                     |                      |
| Change in movement in your stronger hand              |             |                                              |                                                                     |                      |
| Abnormal sleep last night                             |             |                                              |                                                                     |                      |
| Seizure within the last 24 hours                      |             |                                              |                                                                     |                      |
| Other:                                                |             |                                              |                                                                     |                      |
